# Supplementary material
Source: publisher figshare collection journal article supplement (https://tandf.figshare.com/articles/dataset/_/1263937)

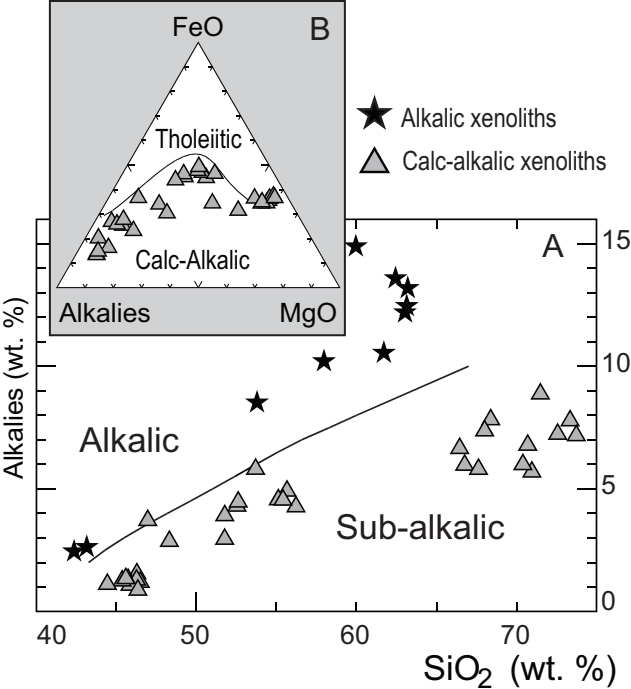

Supplement: Supplementary file 1 [file 1]

OU78 656

zircon

cathodoluminescence

A

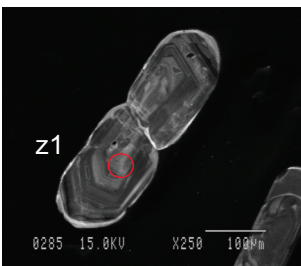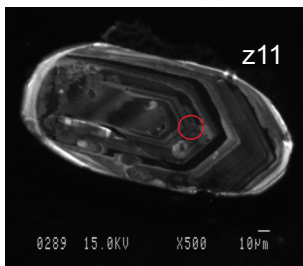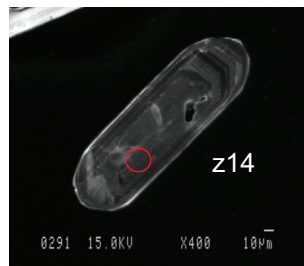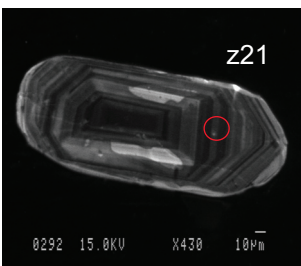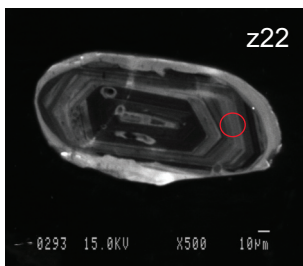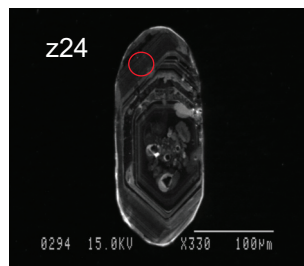

OU78 658

titanite

plane polarised light

B

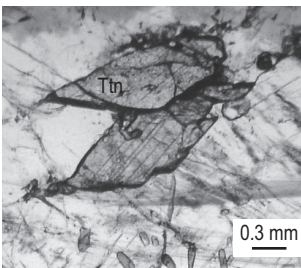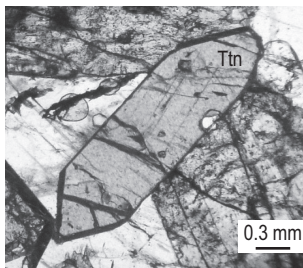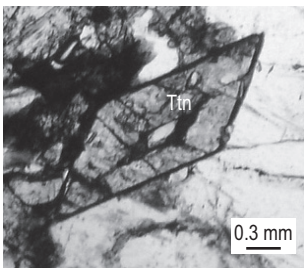

Supplement: Supplementary file 2 [file 1]

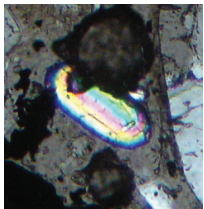

5 cm



Supplement: Supplementary file 3 [file 1]
